# Supplementary material
Source: publisher figshare collection journal article supplement (https://acs.figshare.com/ndownloader/files/30879883)
Supplement: Supplementary file 1 [file 30879883]

# Supporting Information

## Radical Form of $\text{PbI}_2$ : A New Defects Passivator for Efficient Perovskite Solar Cells

*XiuXiu Feng, Jiyao Wei, Xiaodong Li\*, Wenxiao Zhang, Xiaoyan Zhao, Chunyan Lu, Xuemin Guo and Junfeng Fang\**

School of Physics and Electronic Science, Ministry of Education Nanophotonics & Advanced Instrument Engineering Research Center, East China Normal University, Shanghai 200062, China

### **Corresponding Author**

\* [xdli@phy.ecnu.edu.cn](mailto:xdli@phy.ecnu.edu.cn) (X. Li); [jffang@phy.ecnu.edu.cn](mailto:jffang@phy.ecnu.edu.cn) (J. Fang)

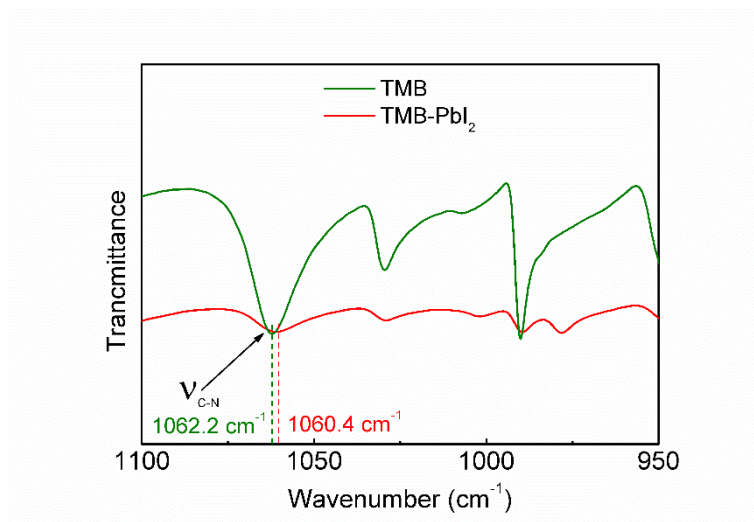

**Figure S1.** Fourier transform infrared spectra (FTIR) of pure TMB and TMB-PbI<sub>2</sub> radical powder. In TMB-PbI<sub>2</sub>, the stretching vibration of C-N bond (C-N) appears at 1060.4 cm<sup>-1</sup>, which is low-wavenumber shift in comparison with that in TMB (1062.2 cm<sup>-1</sup>). This result indicates that some chemical interaction exists between TMB and PbI<sub>2</sub>.

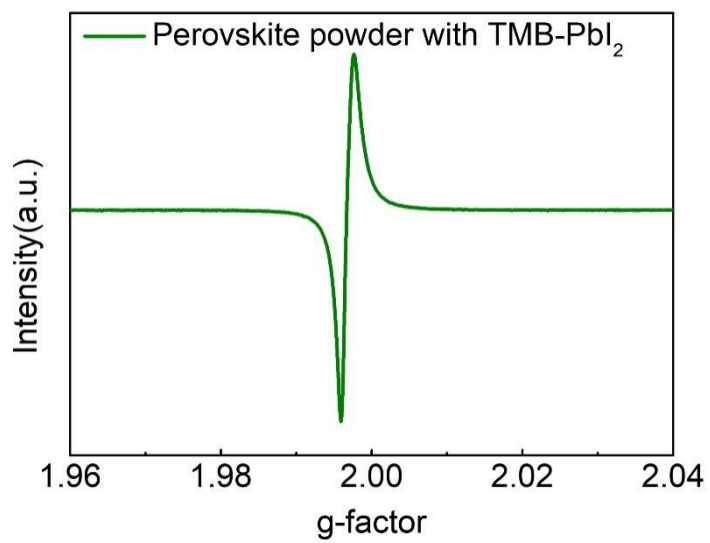

**Figure S2.** Electron spin resonance (ESR) of perovskite powder with TMB-PbI<sub>2</sub>.

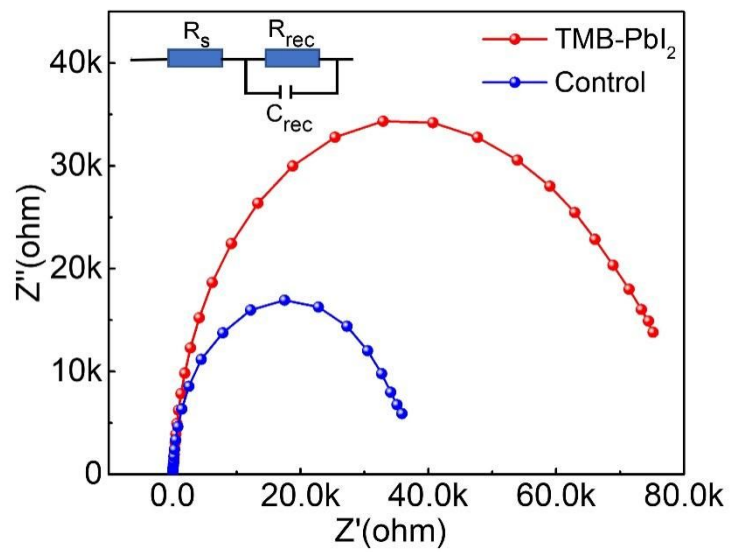

**Figure S3.** Nyquist plots for the control and TMB-PbI<sub>2</sub> based perovskite devices in the dark.

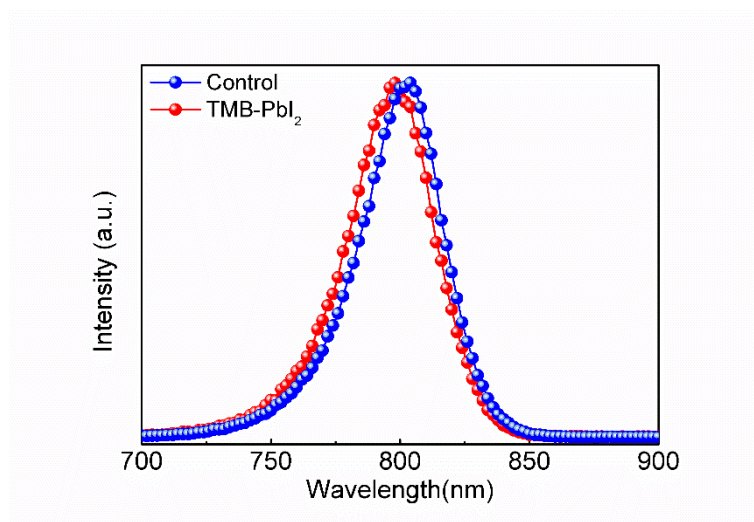

**Figure S4.** Photoluminescence (PL) spectra of control and TMB-PbI<sub>2</sub> based perovskite films. The films are prepared on a glass substrate. The blue-shift of PL in TMB-PbI<sub>2</sub> based perovskite film indicates the defects passivation.

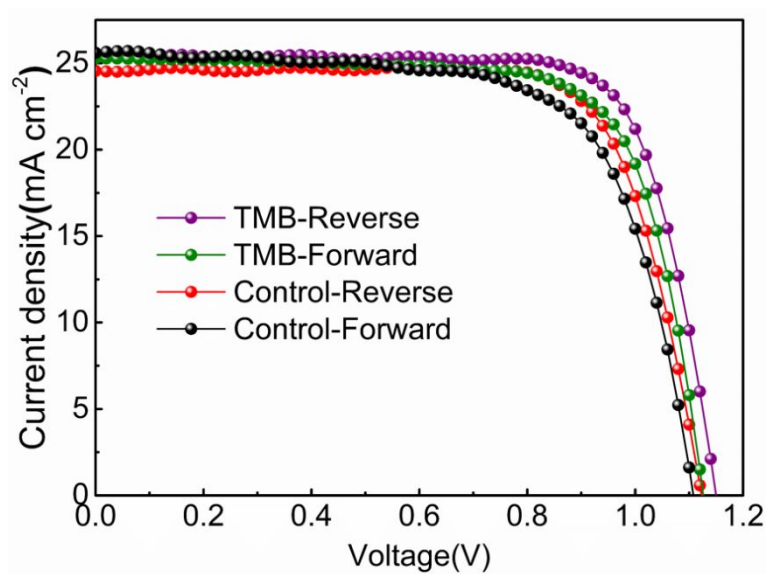

| Name             | $V_{oc}$<br>(V) | $J_{sc}$<br>(mA cm <sup>-2</sup> ) | FF<br>(%) | PCE<br>(%) |
|------------------|-----------------|------------------------------------|-----------|------------|
| TMB-Reverse      | 1.15            | 25.71                              | 75.94     | 22.63      |
| TMB-Forward      | 1.13            | 25.32                              | 73.29     | 20.90      |
| Control-Reverse  | 1.12            | 25.40                              | 71.36     | 20.48      |
| Control- Forward | 1.11            | 25.60                              | 68.55     | 19.44      |

**Figure S-5.** Comparison of hysteresis between TMB-containing devices and control group devices.

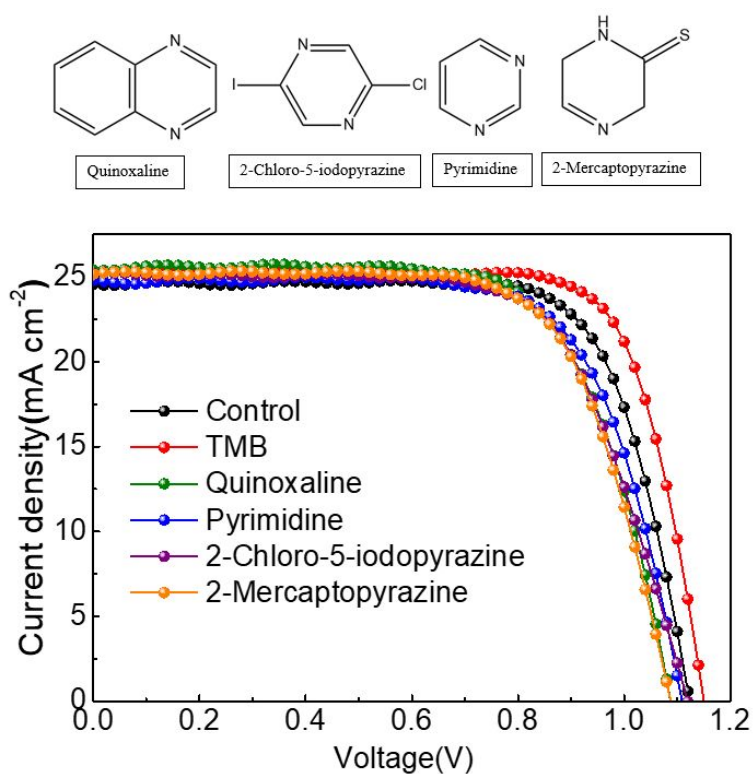

| Name                    | $V_{oc}$<br>(V) | $J_{sc}$<br>( $\text{mA cm}^{-2}$ ) | FF<br>(%) | PCE<br>(%) |
|-------------------------|-----------------|-------------------------------------|-----------|------------|
| Control                 | 1.12            | 25.40                               | 71.36     | 20.48      |
| TMB-PbI <sub>2</sub>    | 1.15            | 25.71                               | 75.94     | 22.63      |
| Quinoxaline             | 1.11            | 24.81                               | 70.86     | 19.71      |
| Pyrimidine              | 1.12            | 25.21                               | 68.20     | 19.25      |
| 2-Chloro-5-iodopyrazine | 1.09            | 25.17                               | 70.12     | 19.20      |
| 2-Mercaptopyrazine      | 1.09            | 25.42                               | 70.04     | 19.35      |

**Figure S6.** Chemical structure of Nitrogen-containing organic small molecule passivation agent and  $J$ - $V$  curves and Performance parameter of PSCs under their treatment.

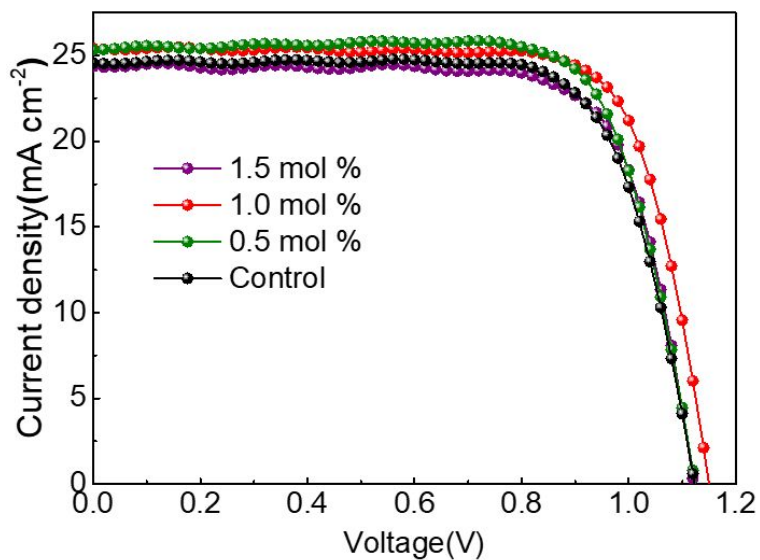

| <b>TMB<br/>concentration<br/>(mol %)</b> | <b><math>V_{oc}</math><br/>(V)</b> | <b><math>J_{sc}</math><br/>(mA cm<sup>-2</sup>)</b> | <b>FF<br/>(%)</b> | <b>PCE<br/>(%)</b> |
|------------------------------------------|------------------------------------|-----------------------------------------------------|-------------------|--------------------|
| Control                                  | 1.12                               | 25.40                                               | 71.36             | 20.48              |
| 0.5                                      | 1.12                               | 25.33                                               | 76.54             | 21.83              |
| 1.0                                      | 1.15                               | 25.71                                               | 75.94             | 22.63              |
| 1.5                                      | 1.12                               | 24.34                                               | 74.94             | 20.68              |

**Figure S7.**  $J$ - $V$  curves of control and different concentration of TMB treatment PSCs.



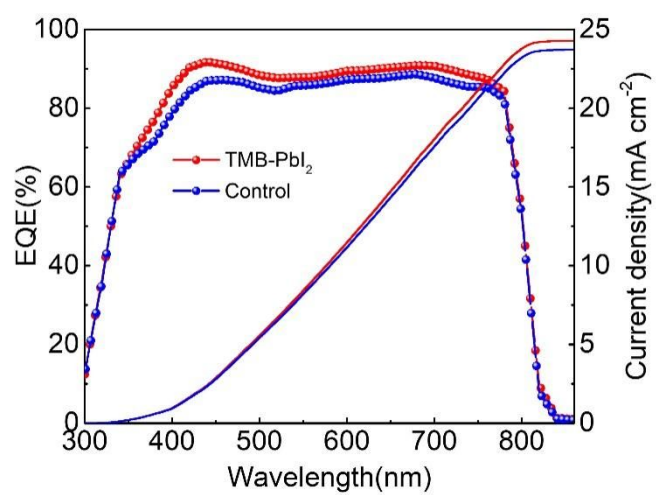

**Figure S8.** External quantum efficiency (EQE) of control and TMB-PbI<sub>2</sub> based PSCs.

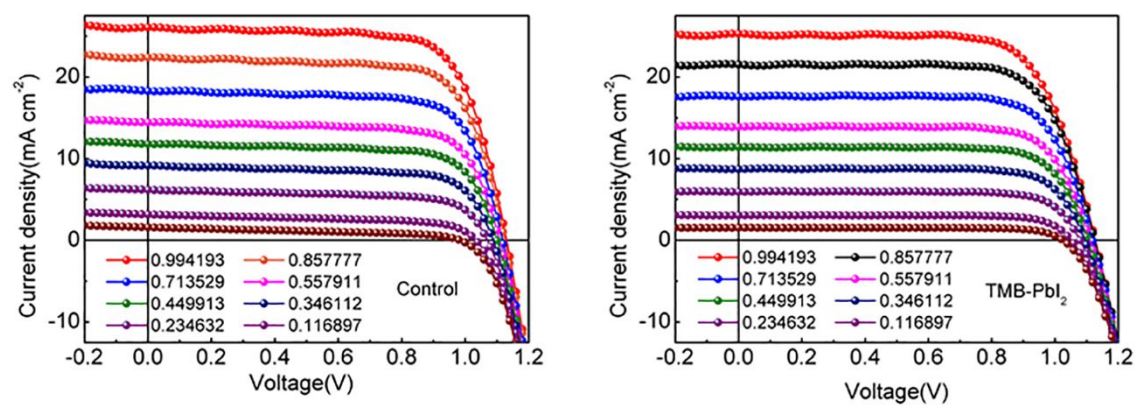

**Figure S9.**  $J$ - $V$  curves of control (left) and TMB-PbI<sub>2</sub> (right) based PSCs under different light intensity.

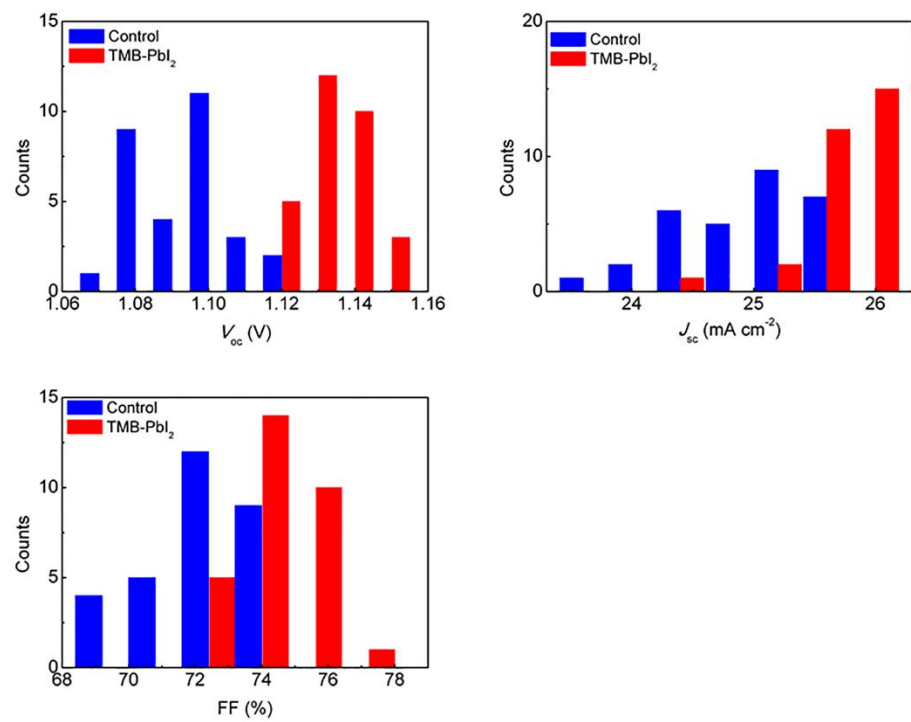

**Figure S10.**  $V_{oc}$ ,  $J_{sc}$  and FF distribution among 30 separated PSCs.
